# Supplementary material
Source: publisher figshare collection journal article supplement (https://frontiersin.figshare.com/ndownloader/files/30773008)
Supplement: Supplementary file 1 [file 30773008]

## Supplemental Materials

| Cue         | Target     | Same-Category/<br>Different-Shape Foils |             |              | Different-Category/<br>Same-Shape Foils |             |            | Same-Category/<br>Same-Shape Foils |            |            | Different-Category/<br>Different-Shape Foils |          |            |
|-------------|------------|-----------------------------------------|-------------|--------------|-----------------------------------------|-------------|------------|------------------------------------|------------|------------|----------------------------------------------|----------|------------|
| antenna     | television | drill                                   | iron        | blender      | book                                    | folder      | safe       | toaster                            | stove      | microwave  | tie                                          | shirt    | pear       |
| bow         | violin     | harp                                    | accordion   | piano        | pipe                                    | racket      | key        | sitar                              | guitar     | banjo      | cat                                          | dog      | horse      |
| chicken     | egg        | banana                                  | asparagus   | carrot       | balloon                                 | lightbulb   | baseball   | pear                               | watermelon | lemon      | flute                                        | hammer   | axe        |
| cigarette   | ashtray    | stove                                   | toaster     | iron         | belt                                    | wheel       | ring       | pan                                | plate      | bowl       | oar                                          | airpump  | asparagus  |
| cow         | milk       | apple                                   | pumpkin     | tomato       | battery                                 | microphone  | lightbulb  | smoothie                           | wine       | water      | umbrella                                     | drill    | television |
| dustpan     | broom      | lawnmower                               | wheelbarrow | scissors     | pencil                                  | flute       | oar        | hoe                                | spade      | rake       | piano                                        | camera   | accordion  |
| foot        | shoe       | sweater                                 | skirt       | scarf        | wood                                    | canoe       | fish       | glove                              | wallet     | hat        | worm                                         | cactus   | plug       |
| fork        | knife      | scissors                                | drill       | iron         | oar                                     | cigarette   | flute      | wrench                             | screw      | chisel     | squirrel                                     | worm     | piano      |
| grapes      | wine       | coffee                                  | beer        | tea          | flashlight                              | battery     | microphone | milk                               | water      | cola       | drill                                        | belt     | umbrella   |
| lamp        | lightbulb  | toaster                                 | stove       | telephone    | lemon                                   | egg         | pear       | glass                              | microphone | whisk      | skunk                                        | horse    | raccoon    |
| lock        | key        | drill                                   | iron        | scissors     | racket                                  | pipe        | guitar     | chisel                             | screw      | wrench     | elephant                                     | turtle   | pumpkin    |
| monkey      | banana     | pumpkin                                 | onion       | tomato       | pencil                                  | flute       | ruler      | carrot                             | asparagus  | corn       | camera                                       | palette  | harp       |
| mouse       | cheese     | bagel                                   | pizza       | donut        | dice                                    | harmonica   | soap       | coconut                            | pie        | cupcake    | bicycle                                      | airplane | scissors   |
| nail        | hammer     | iron                                    | scissors    | trowel       | carrot                                  | asparagus   | corn       | axe                                | chisel     | corkscrew  | onion                                        | tiger    | apple      |
| rabbit      | carrot     | pumpkin                                 | apple       | onion        | flute                                   | screwdriver | chisel     | banana                             | corn       | asparagus  | piano                                        | bicycle  | shirt      |
| rain        | umbrella   | drill                                   | scissors    | iron         | parachute                               | mushroom    | jellyfish  | racket                             | cane       | flag       | bicycle                                      | monkey   | airplane   |
| rake        | leaf       | carrot                                  | banana      | cactus       | parachute                               | pinwheel    | kite       | pineapple                          | broccoli   | artichoke  | bicycle                                      | belt     | piano      |
| stethoscope | heart      | tooth                                   | nose        | eye          | apple                                   | pineapple   | pear       | kidney                             | liver      | stomach    | oar                                          | nail     | flute      |
| toaster     | bread      | turnip                                  | carrot      | pear         | book                                    | wood        | eraser     | pie                                | pizza      | burger     | screw                                        | nail     | wrench     |
| tripod      | camera     | lightbulb                               | microphone  | flashlight   | piano                                   | accordion   | harp       | radio                              | telephone  | binoculars | horse                                        | zebra    | squirrel   |
| vase        | flowers    | asparagus                               | carrot      | cactus       | kite                                    | pinwheel    | parachute  | broccoli                           | mushroom   | artichoke  | raccoon                                      | lizard   | skunk      |
| web         | spider     | turtle                                  | snail       | fish         | antenna                                 | helicopter  | fan        | crab                               | ladybug    | seastar    | knife                                        | oar      | flute      |
| wheel       | airpump    | scissors                                | iron        | drill        | oar                                     | pencil      | flute      | corkscrew                          | hammer     | axe        | onion                                        | tomato   | pumpkin    |
| whisk       | bowl       | toaster                                 | stove       | refrigerator | turtle                                  | baseball    | igloo      | teapot                             | plate      | kettle     | horse                                        | cow      | piano      |

*Supplementary Table 1.* Stimuli in the thematic eye tracking task. Cues and targets are thematically associated. Each target is paired with 12 distractor foils, which are either from the same or a different category, and share a similar or different shape with the target.

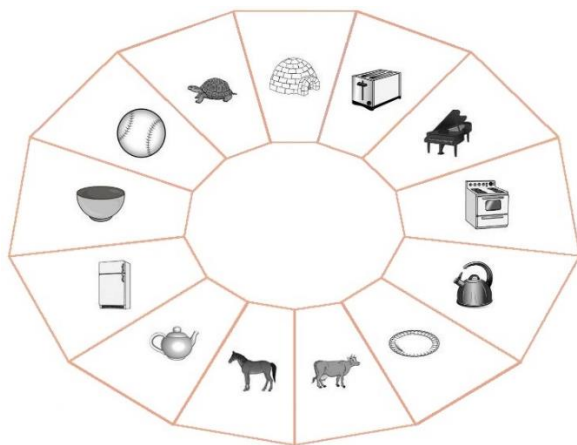

*Supplementary Figure 1.* Areas of interest. Eye movements within each AOI were attributed to that object, and those falling outside the AOIs were excluded from analysis.

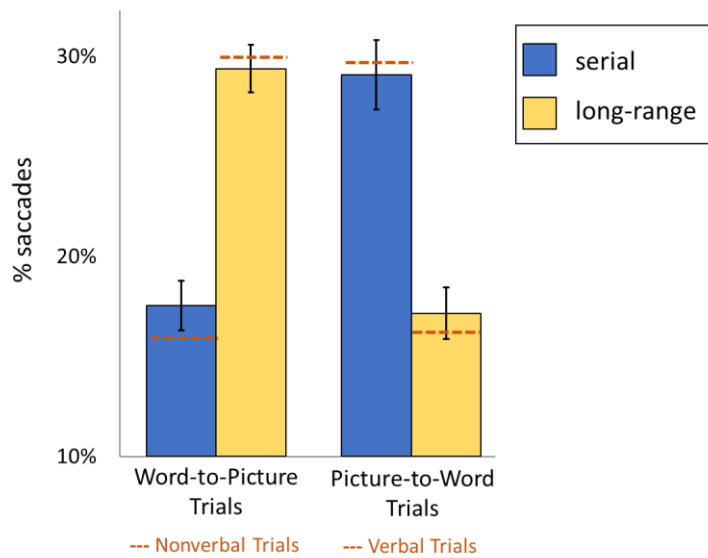

*Supplementary Figure 2.* Percentage of serial and long-range saccades on the cross-platform word-to-picture and picture-to-word trials are shown. Orange dotted lines represent comparable values from nonverbal (picture-to-picture) and verbal (word-to-word) trials.

|                                    | Univariate    |         | Multivariable |                     |
|------------------------------------|---------------|---------|---------------|---------------------|
|                                    | Estimate (SE) | P-Value | Estimate (SE) | P-Value             |
| Distance to Target                 | -0.20 (0.03)  | <0.001* | -0.19 (0.04)  | <0.001 <sup>†</sup> |
| Salience                           | 0.41 (0.33)   | 0.213   | 0.66 (0.33)   | 0.044 <sup>†</sup>  |
| Shape                              | 1.97 (0.20)   | <0.001* | 1.88 (0.20)   | <0.001 <sup>†</sup> |
| Category                           | 1.01 (0.20)   | <0.001* | 1.11 (0.21)   | <0.001 <sup>†</sup> |
| Absolute Word Length               | 0.18 (0.05)   | 0.001*  | 0.11 (0.06)   | 0.055               |
| Word Length Difference from Target | 0.12 (0.06)   | 0.044   | 0.07 (0.06)   | 0.283               |
| Lexical Frequency                  | -0.08 (0.05)  | 0.152   | 0.02 (0.06)   | 0.746               |

*Supplementary Table 2.* Predictors of viewing times on cross-platform word-to-picture trials. Parameter estimates (and the standard error associated with each) are shown when considered in isolation (univariate) and in combination with the other predictors (multivariable). \*:  $p < .007$  (Bonferroni correction). <sup>†</sup>:  $p < .05$ .

|                                    | Univariate    |         | Multivariable |                     |
|------------------------------------|---------------|---------|---------------|---------------------|
|                                    | Estimate (SE) | P-Value | Estimate (SE) | P-Value             |
| Distance to Target                 | -0.20 (0.03)  | <0.001* | -0.23 (0.03)  | <0.001 <sup>†</sup> |
| Salience                           | -0.09 (1.04)  | 0.933   | -0.31 (1.03)  | 0.768               |
| Shape                              | -0.16 (0.20)  | 0.410   | -0.21 (0.20)  | 0.295               |
| Category                           | 0.38 (0.20)   | 0.051   | 0.16 (0.20)   | 0.424               |
| Absolute Word Length               | 0.41 (0.05)   | <0.001* | 0.44 (0.06)   | <0.001 <sup>†</sup> |
| Word Length Difference from Target | -0.03 (0.06)  | 0.650   | -0.18 (0.06)  | 0.004 <sup>†</sup>  |
| Lexical Frequency                  | -0.31 (0.05)  | <0.001* | -0.14 (0.06)  | 0.012 <sup>†</sup>  |

*Supplementary Table 3.* Predictors of viewing times on cross-platform picture-to-word trials. \*:  $p < .007$ . <sup>†</sup>:  $p < .05$ .
